# Supplementary material
Source: Royal Society of Chemistry journal article supplement (doi:10.1039/d5fb00583c)
Supplement: d5fb00583c1.pdf [file d5fb00583c1.pdf]

## Harnessing Machine Learning for Chicken Meat Quality Evaluation Using Curcumin-loaded Methylcellulose Intelligent Films

Suresh Chandra Varsha<sup>a,b,‡</sup>, Ashique Thazheparamban<sup>a,b,‡</sup>, Arunkumar Panneerselvam<sup>\*a,b</sup>

<sup>a</sup>Department of Food Packaging Technology, CSIR-Central Food Technological Research Institute, Mysuru, 570020, India.

<sup>b</sup>Academy of Scientific and Innovative Research (AcSIR), Ghaziabad, 201002, India.

<sup>‡</sup>These authors contributed equally.

Email: [arunpselvam.cftri@csir.res.in](mailto:arunpselvam.cftri@csir.res.in)

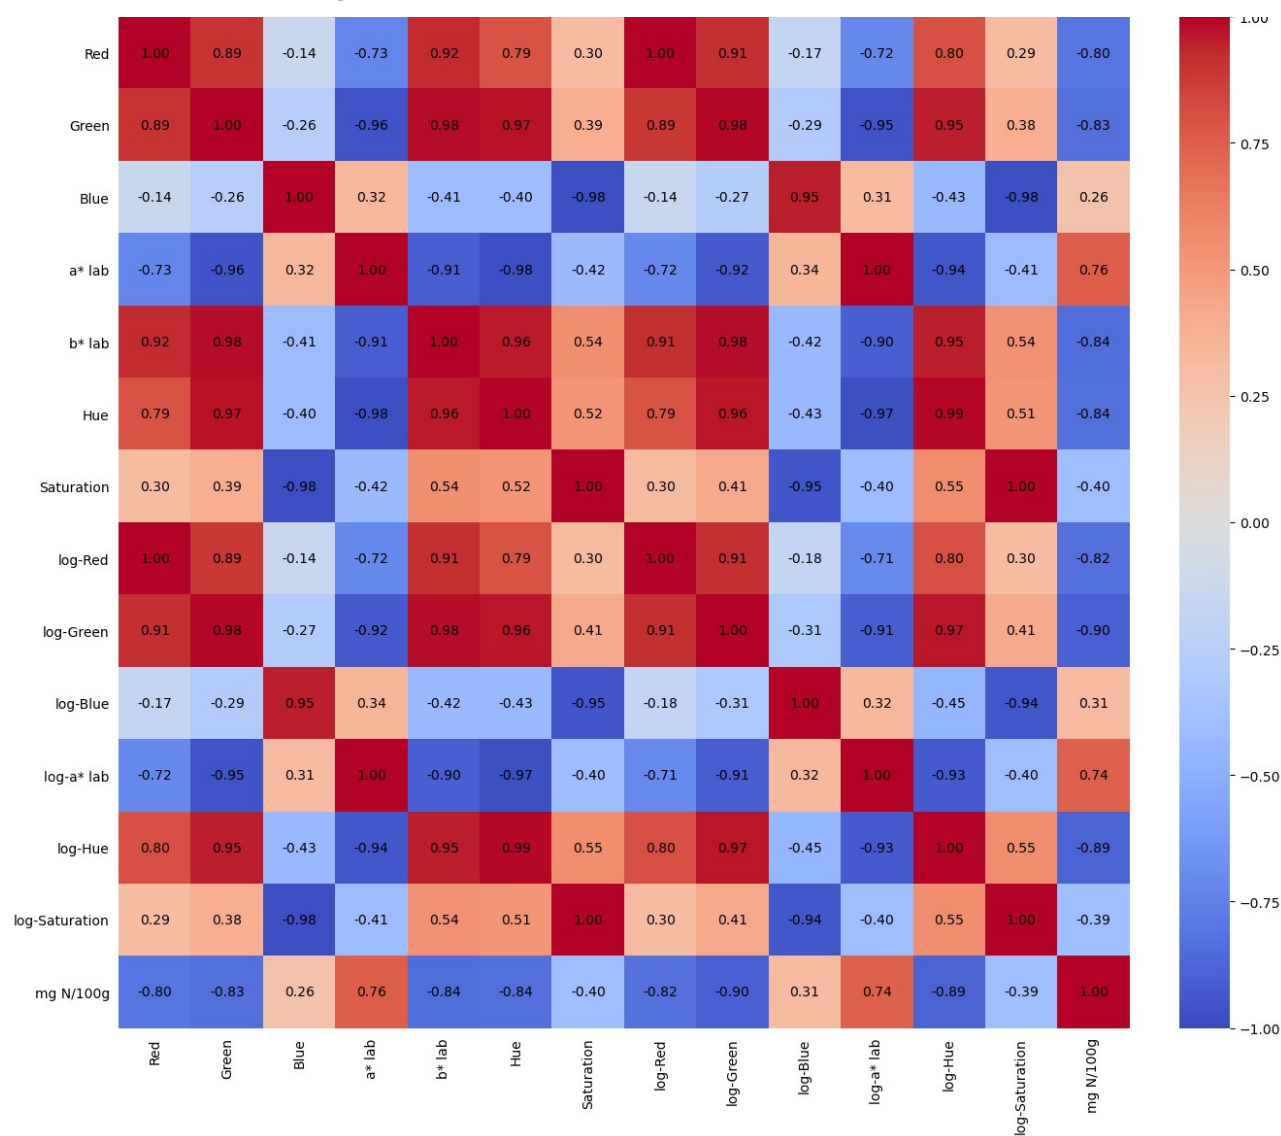

Fig. S1 Correlation matrix of extracted features from the images used for ML model training.

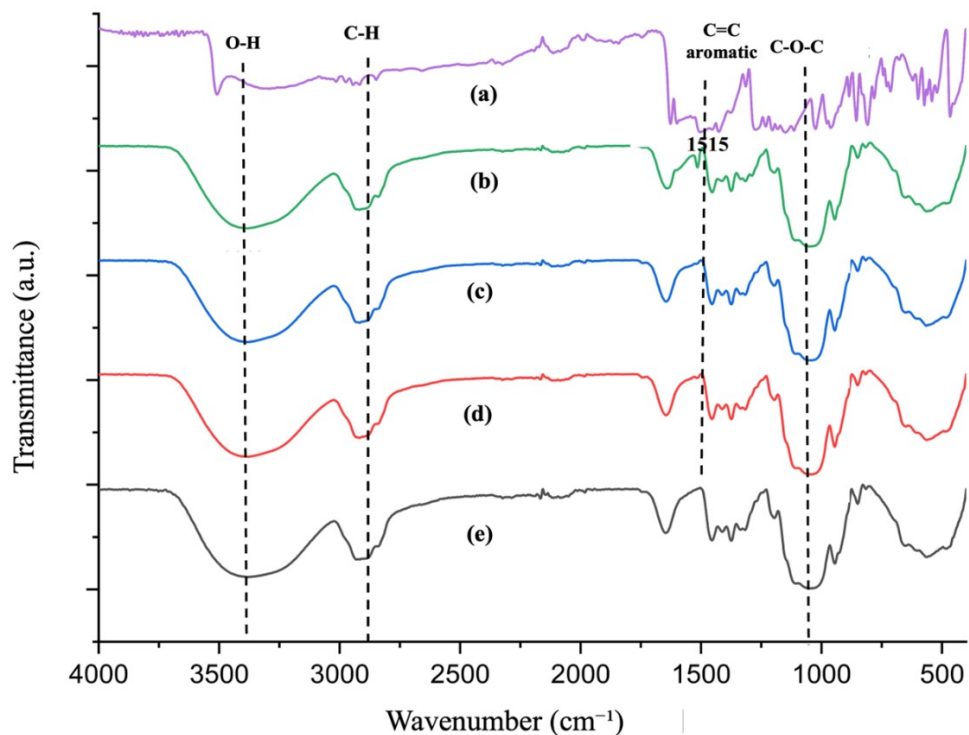

**Fig. S2** ATR-FTIR spectra of (a) Cur powder, (b) MC/3.0% Cur, (c) MC/1.0% Cur, (d) MC/0.5% Cur, and (e) neat MC films.

**Table S1** Classification model analysis.

| Models              | Best Parameters                                                                                               | Accuracy (%) | Mean 10-fold Cross-Validated Accuracy (%) |
|---------------------|---------------------------------------------------------------------------------------------------------------|--------------|-------------------------------------------|
| Logistic Regression | C: 1, Solver: liblinear                                                                                       | 90.1         | 88.6±2.0                                  |
| SVC                 | C: 10, Kernel: RBF                                                                                            | 96.0         | 95.0±2.3                                  |
| Decision Tree       | Max depth: 10, Min samples split: 2                                                                           | 96.4         | 95.5±1.5                                  |
| ANN                 | Activation: ReLU, Hidden layers: (50, 50), Alpha: 0.01, Max iter: 3000, Solver: Adam, Learning rate: constant | 96.5         | 96.3±1.1                                  |

**Table S2** Regression model analysis.

| <b>Models</b>     | <b>Best Parameters</b>                                                                                             | <b>RMSE<br/>(mg N/100g)</b> | <b>R<sup>2</sup></b> | <b>Mean 10-fold<br/>Cross-Validated R<sup>2</sup></b> |
|-------------------|--------------------------------------------------------------------------------------------------------------------|-----------------------------|----------------------|-------------------------------------------------------|
| ANN               | Activation: ReLU, Alpha: 0.01, Hidden layer sizes: (50, 50), Learning rate: constant, Max iter: 3000, Solver: Adam | 1.991                       | 0.928                | 0.940±0.016                                           |
| SVR               | C: 100, Gamma: scale, Kernel: RBF                                                                                  | 1.981                       | 0.928                | 0.939±0.019                                           |
| Linear Regression | Default parameters used                                                                                            | 3.665                       | 0.755                | 0.794±0.03                                            |

**Table S3** Hyperparameters of ANN models.

| <b>Parameters</b> | <b>Regression ANN (MLPRegressor)</b>   | <b>Classification ANN (MLPClassifier)</b> |
|-------------------|----------------------------------------|-------------------------------------------|
| Input features    | 3 (log-Hue, Saturation, b* Lab)        | 3 (log-Hue, Saturation, b* Lab)           |
| Hidden layers     | (50, 50) – two layers, 50 neurons each | (50, 50) – two layers, 50 neurons each    |
| Activation        | ReLU                                   | ReLU                                      |
| Solver            | Adam                                   | Adam                                      |
| Alpha             | 0.01                                   | 0.01                                      |
| Learning rate     | Constant                               | Constant                                  |
| Max iterations    | 3000                                   | 3000                                      |
| Random state      | 42                                     | 42                                        |
| Output neurons    | 1 (continuous value: mg N/100g)        | 3 classes (freshness categories)          |
| Output activation | Linear                                 | Softmax                                   |
